# Supplementary material
Source: publisher site journal article supplement (https://www.dovepress.com/article/377581)
Supplement: Supplementary file 1 [file get_supplementary_file.php]

Supplementary Table 1.Nursing Quality Control

| Project | Number | Assess quality content | Evaluation | | |
| --- | --- | --- | --- | --- | --- |
| Not implemented 0 point | Partial implementation 1-3 points | Implement 4-5 points |
| Various inspection records | 1 | The head nurse in the area records five ward rounds every day to find problems or hidden dangers in nursing |  |  |  |
| 2 | The operating room temperature is maintained at 21-25°C, and the humidity is maintained at 30%-60%, with monitoring records |  |  |  |
| 3 | Operating room power equipment (electric knife, ultrasonic knife, electric drill) and emergency equipment have maintenance, use and cleaning records |  |  |  |
| 4 | The nursing routine of the specialist group is updated and training new nurses, rotating nurses or continuing teachers study notes |  |  |  |
| 5 | Regularly monitor the number of bacteria in the operating room, medical staff's hands, surfaces, disinfectants, etc., and have complete records. Those who fail to pass will have reason analysis, rectification measures and effect evaluation |  |  |  |
| 6 | The head nurse checks the records of the quality control working group in charge, executes activities as planned, has weekly inspections, monthly evaluations and improvement measures and records |  |  |  |
| View on site | 7 | Check the notice, and the head nurse will arrange flexible shifts for all types of nurses at all levels according to the surgical situation, to ensure the orderly deployment of surgical schedules, and to effectively implement the safeguards and coordination mechanisms for the green channel of emergency surgery |  |  |  |
| 8 | Those who are studying or visiting must be active in the designated operating room, and the nurses manage the number of operating rooms at different levels according to the norm (level I - 14 people, level II - 12 people, level III - 10 people) |  |  |  |
| 9 | Ask the operating room nurse to cooperate with the "five clear" evaluation of the operation (basic equipment dressing, nursing routine, body position, doctor's preference, special supplies), and check whether the preoperative preparation is complete |  |  |  |
| 10 | Check whether the use of various sterile items is implemented in accordance with the specifications |  |  |  |
| 11 | Check whether the intraoperative aseptic technique and isolation technique are implemented in accordance with the specifications |  |  |  |
| 12 | Check the preoperative and intraoperative, before closing the chest, abdomen, and body cavities, and check and verify the implementation |  |  |  |
| 13 | Check whether the nursing assistants and nurses in the waiting area verify whether the basic information of the patient and the room entry information are correct, and use at least two confirmation methods by two people to avoid the wrong patient entering the wrong operating room. |  |  |  |
| 14 | Check on site whether the implementation of the tripartite safety inspection is in place |  |  |  |
| 15 | Check that the storage, custody, handover, and records of surgical specimens are in place |  |  |  |
| 16 | Check whether the protection of various surgical positions is in place |  |  |  |
| 17 | Check whether the preoperative antibiotic usage and safe blood usage are in place |  |  |  |
| 18 | Specialized person management: Surgical specimens are managed by special personnel, and surgical specimens are stored at designated locations and managed by locking; special personnel manage flammable and explosive dangerous goods and gases, etc., and there are dangerous goods warning signs; There is a special person responsible for the management of the sterile material storage area; the special person and post are put in place and the relevant records are checked |  |  |  |
| Self-improvement | 19 | Regularly communicate with specialist groups and clinical departments, and keep records of clinical opinions or suggestions for improvement. |  |  |  |
| 20 | Completion of self-examination items such as epidemic situation and hospital infection every month, and records of nursing rounds, business learning, specialist group activities, emergency drills, satisfaction surveys, etc. |  |  |  |
| Score |  | | | | |

Supplementary Table 2.Nursing Safety Management

| Project | Number | Assess quality content | Evaluation | | |
| --- | --- | --- | --- | --- | --- |
| Not implemented 0 point | Partial implementation 1-3 points | Implement 4-5 points |
| Preoperative management | 1 | The personnel entering the room are neatly dressed and meet the requirements of the post. The entry of non-surgical personnel is strictly restricted. The entrants are neatly dressed and need to change their clothes and shoes when they go out. |  |  |  |
| 2 | Check the safety of the transfer tool, and use the matching safety protection device when transferring the patient to prevent accidents from happening |  |  |  |
| 3 | Do a good job in the handover of patients receiving surgery and the ward, check and confirm the patient's identity, and accurately fill in the "Surgical Patient Transfer and Handover Form" |  |  |  |
| 4 | Surgical drug safety: drugs (internal drugs, external drugs, anesthetics, etc.) are classified and designated, placed in special counters, kept by special personnel, recorded in detail, regularly counted, and have no expired deterioration. |  |  |  |
| Intraoperative management | 5 | Carefully check the patient's identity information and surgical information (the operating room knows: patient's name, age, operation name, surgical site, operating room number, condition, important positive results, anesthesia method, past history, allergy history) |  |  |  |
| 6 | The placement position is safe, correct and restrained properly, preventing pressure ulcers, dysfunction, falling from bed and other accidents, and ensuring the safety of patients |  |  |  |
| 7 | Establish effective venous access, maintain smooth infusion, and ensure medication safety |  |  |  |
| 8 | Prepare the necessary items for the operation, strictly inspect the disposable sterilized items before taking them, and take them in a standardized manner. It is strictly forbidden to throw them or take them across the sterile area. |  |  |  |
| 9 | Intraoperative blood transfusion, strictly carry out three checks and ten pairs, two medical staff check and sign, there is a blood transfusion registration book, and blood transfusion patients have records |  |  |  |
| 10 | Strengthen intraoperative inspections, implement various safety protection and radiation protection, and protect the safety of patients |  |  |  |
| 11 | Correctly use flammable facilities such as electrosurgery and alcohol to prevent burning and fire accidents |  |  |  |
| Post-operative management | 12 | Safety management during the recovery period: the patient should take a comfortable position, properly restrained, and prevent falling out of bed; prepare rescue materials to prevent accidents such as aspiration |  |  |  |
| 13 | Prepare for transfer work: goods, personnel are complete, patient response cooperation |  |  |  |
| 14 | When the patient leaves the operating room for infusion, there is an infusion card, the items are filled in completely, and the bottle is signed with the patient's bed number, name, and the nurse's signature |  |  |  |
| Surgical Specimen Management | 15 | Routine specimen management: Intraoperative nurses keep the specimens properly, and small specimens that are easy to dry are kept in saline for moisturizing, and placed in a curved plate; large specimens are placed in a leak-free container; Lymph nodes immediately identify name, location |  |  |  |
| 16 | Frozen rapid section delivery management: the visiting nurses paste the label and check the name of the specimen, fill in the special handover registration book, and send it to the pathology department by a special elevator |  |  |  |
| 17 | Specimen cabinets have lockable safety measures, avoid direct sunlight, and room temperature is below 24°C |  |  |  |
| 18 | The specimen manager sends routine specimens as required every day, and has handover and records with the pathology department, which can be traced (preserved for 3 years) |  |  |  |
| Emergency safety manage | 19 | Rescue materials (such as aspirator, central oxygen supply, emergency lights, flashlights, plugboards, etc.) are complete and in standby |  |  |  |
| 20 | Nurses are aware of "patient safety management emergency plans and procedures" and have the ability to use them (such as fire, water outage, power outage, etc.) |  |  |  |
| Score |  | | | | |

Supplementary Table 3.Disinfection and isolation

| Project | Number | Assess quality content | Evaluation | | |
| --- | --- | --- | --- | --- | --- |
| Not implemented 0 point | Partial implementation 1-3 points | Implement 4-5 points |
| Environment layout | 1 | The layout is reasonable, the three zones are clearly divided, and the functions of each zone are strictly implemented |  |  |  |
| 2 | The operating room is clean, and the items in each room are placed in an orderly manner, positioned and clearly marked. |  |  |  |
| 3 | Operating room doors remain closed during work |  |  |  |
| 4 | The temperature and humidity in the operating room meet the requirements (temperature 21-25°C, humidity 30%-60%) |  |  |  |
| Cleaning and disinfection of basic items | 5 | Regularly sterilize the vehicle for transporting patients, and keep the wheels, body and items on the vehicle clean |  |  |  |
| 6 | Clean operating department: Fresh air and return air should be treated with primary, medium, sub-efficient and high-efficiency filters, with detailed records of cleaning, disinfection and replacement, and the return air grille should be cleaned 1-2 times a week to keep it clean and record detailed. |  |  |  |
| 7 | For consecutive operations, the air and surfaces of objects must be cleaned and disinfected, and final treatment must be performed immediately after the operation. |  |  |  |
| 8 | Medical refrigerators and incubators are cleaned and items are placed in an orderly manner |  |  |  |
| 9 | All kinds of instruments are properly kept, repaired in a timely manner, kept in good condition, with operating procedures, and records of maintenance, maintenance, use, cleaning and disinfection of large instruments are kept |  |  |  |
| 10 | Cleaning tools are used in different areas, marked with different colors, washed after use, soaked in 500mg/L chlorine-containing disinfectant for 30 minutes, washed, hung, and dried for later use |  |  |  |
| Sterile items and aseptic technique | 11 | Sterile instruments and articles should be sterilized for one use, one needle and one tube for one person for injection, and one for one person, one needle, one tube and one towel for venipuncture. |  |  |  |
| 12 | Strictly distinguish sterile items, place sterile items in special counters (20cm from the ground, 5cm from the wall, and 50cm from the ceiling), and the cabinets should be clean, free of dust and clearly marked. |  |  |  |
| 13 | Pressure steam sterilization, low temperature sterilization (ethylene oxide sterilization, hydrogen peroxide plasma sterilization), surgical instrument packs, dressing packs and other items need to be classified and placed in the special counters according to the sterilization date or validity period. The outer label is marked with the item name, sterilization date, expiration date or expiration date, chemical indicator tape (sealed at the opening) and signature, and used within the expiration date |  |  |  |
| 14 | Foreign medical devices (including implants) must be uniformly cleaned and sterilized by the hospital, and used after passing the biological monitoring |  |  |  |
| 15 | The use time of sterile holding forceps stored in dry tanks should be ≤4 hours. The time should be indicated for the withdrawn medicinal solution and the opened sterile fluid for intravenous infusion. The effective time should be ≤2 hours. |  |  |  |
| 16 | Hand sanitizers are marked with the date of use after opening and are valid for 3 months or 90 days; Iodophor disinfectant is valid for 1 month; 100ml alcohol and iodophor cotton swabs are valid for 1 week Chlorine-containing disinfectant is prepared correctly, with concentration and configuration time markings |  |  |  |
| 17 | Medical staff perform preoperative surgical hand brushing, the method is correct, no less than 3 minutes; Complete hand hygiene facilities, equipped with nail scissors, and hand disinfection facilities that meet the requirements |  |  |  |
| 18 | The management of the instrument table: the items are placed in an orderly manner, the table surface is flat, the sterile items cannot extend beyond the edge of the instrument table, the unsterilized arm cannot cross the sterile area, and the instruments are delivered accurately.The surgical field area is clean and tidy, and the instrument table is free of moisture and pollution |  |  |  |
| Medical Waste Management | 19 | According to the "Medical Waste Management Measures" and other relevant national requirements for classified collection and management; There are warning signs on the outer surface of the sharps box, indicating the use time, not exceeding 48 hours |  |  |  |
| 20 | The operating bed is clean and sterilized in line with the requirements, and the dirty quilt and dirt are placed in the bag and placed in the designated dirty area Infectious patients shall be subject to relevant isolation measures according to regulations, and the post-use disposal procedures of diagnostic equipment, instruments and articles contaminated by special pathogens shall comply with the norms |  |  |  |
| Remark | 1 point will be deducted for each item that does not meet the requirements | |  |  |  |
| Score |  | | | | |

Supplementary Table 4.Patient satisfaction

| Number | Question | Evaluation | | |
| --- | --- | --- | --- | --- |
| 1 point | 3 points | 5 points |
| 1 | When picking up the patient and after entering the operating room, whether the nurse will check with you the bed number, name, surgical site and other relevant information | Dissatisfied | General | Satisfied |
| 2 | Did the nurse in the operating room give you explanations or instructions before giving you an operation or treatment? | Dissatisfied | General | Satisfied |
| 3 | Are you satisfied with the operating room environment (eg temperature) | Dissatisfied | General | Satisfied |
| 4 | Are you satisfied with the toys, books and other services provided to the children in the operating room? | Dissatisfied | General | Satisfied |
| 5 | Are you satisfied with the puncture technique of the operating room nurse? | Dissatisfied | General | Satisfied |
| 6 | Are you answerable and clear about the contents of the preoperative visit and the 3-day postoperative follow-up visit by the operating room nurse? | Dissatisfied | General | Satisfied |
| 7 | Are you satisfied with the protection of your privacy in transit? | Dissatisfied | General | Satisfied |
| 8 | When not under general anesthesia, does the operating room nurse take the initiative to check your condition and needs | Dissatisfied | General | Satisfied |
| 9 | After the operation, will the nurse take your belongings (clothes, images, etc.) with you back to the ward | Dissatisfied | General | Satisfied |
| 10 | Your overall evaluation of the operating room nursing service | Dissatisfied | General | Satisfied |
| What comments and suggestions do you have for operating room nursing services: | | | | |
|
|
|
|

Supplementary Table 5.Doctor’s satisfaction

| Number | Question | Evaluation | | |
| --- | --- | --- | --- | --- |
| 1 point | 3 points | 5 points |
| 1 | Are you satisfied that the time for the first elective operation to enter the operating room is completed at 8:00？ | Dissatisfied | General | Very satisfied |
| 2 | Before the operation starts, whether the nurses in the operating room prepare all the items (including special small items) | Incomplete | General | Complete |
| 3 | Are you satisfied with the general positions placed by the nurses in the operating room (some positions require the assistance of doctors) | Dissatisfied | General | Very satisfied |
| 4 | Whether the nurse in the operating room cooperates with the surgical delivery equipment actively, is familiar with it, and is very proficient | Unskilled | General | skilled |
| 5 | Whether the nurses often patrolled and dealt with sudden abnormalities in a timely manner during the operation | Not timely | General | Timely |
| 6 | Do nurses talk about topics not related to surgery during surgery | Often | Occasionally | Generally none |
| 7 | What do you think of the service attitude of the nurses in the operating room? | Dissatisfied | General | Very satisfied |
| 8 | Are you satisfied with the operating room environment? | Dissatisfied | General | Very satisfied |
| 9 | Can the nurses on duty in the operating room adhere to the spirit of prudence and independence? | General | Serious | Very serious |
| 10 | Whether to urge interns, advanced students and surgeons to correctly perform aseptic technique operations | General | Serious | Very serious |
| 11 | Which soil protectors are you most satisfied with in the operating room (overall number or name): |  | | |
| 12 | Which nurses (work uniform number or name) are you dissatisfied with, please list your case studies |  | | |
